# Supplementary material for: Elastography in the assessment of the Achilles tendon: a systematic review of measurement properties
Source: J Foot Ankle Res. 2023 Apr 27;16:23. doi: 10.1186/s13047-023-00623-1 (PMC10134611; doi:10.1186/s13047-023-00623-1)
Supplement: Supplementary file 5 — Additional file 5: Appendix 5. Articles methodology inconsistencies. [file 13047_2023_623_MOESM5_ESM.xlsx]

## Sheet: Appendix 5 Methodology inconsis
Appendix 5 - Articles methodology inconsistencies
	Authors & year	Patient positioning	Part of tendon investigated	Probe position	Measurements taken	Examiners	US settings for acquisition	Image analysis	ROI
Strain elastography	Drakonaki et al., 2009	Prone with feet hanging freely.	The middle third of the free tendon is halfway between the most distal part of the myotendinous junction and the most proximal part of the calcaneal insertion of the tendon.	(1) L (2) T	(1) Relaxed position Examined three times	Two radiologists but experience not reported	Extended combined auto-correlation method	In each plane, three compression-relaxation cycles were applied and the images were stored as cine-loops in the memory of the ultrasound system - inbuilt software for strain ratio calculation	Manually applied circular ROIs measuring 4-5 mm in diameter (in the transverse elastograms) and rectangular ROIs measuring 3-5 mm in depth and 15-17 mm in length (in the longitudinal elastograms), including the central part of the tendon (B) and an area of fat.
	Ooi et al., 2015	Prone with feet hanging freely.	Proximal (musculotendinous junction), middle (2–6 cm above insertion at the calcaneus) and distal (insertion at the calcaneum)	(1) L (2) T	(1) Relaxed position Strain ratio calculated 3 times and a mean taken	Two sonographers with >10 years experience in musculoskeletal US imaging and >2 years in elastography	Standardized system settings were employed: smoothening medium, persistence high, dynamic range medium.	Using a manually applied ellipsoid region of interest. The region of interest (measuring 3– 13 mm in width and 20–25 mm in length) was first placed in the center of the Achilles tendon. An equally sized area of Kager’s fat was then included, and the strain ratio was determined using the built-in QLab analysis.	To Kager’s fat - set such that vertically, it extended from the subcutaneous layer to about three times the Achilles tendon size, and horizontally, across at least three-fourths of the entire width of the screen
	Yamamoto et al., 2016	Prone with feet hanging freely.	Middle third of the tendon between the musculotendinous junction and the calcaneal insertion - midportion of the tendon	(1) L	(1) Relaxed position Strain ratio calculated 3 times and a mean taken	Two orthopedic surgeons with >7 years of experience in musculoskeletal US imaging and >2 years in elastography	Measured by built in softwear	The region of interest for the coupler and the Achilles tendon was defined as a rectangle with 4 cm sides (automatically measured by built-in software.	Acoustic coupler with a known Young modulus made of elastomer resin
	Schneebeli et al., 2016	Prone with the ankle in the ergometer at 0° of flexion	Level of the medial malleolus - whole structure was analysed	(1) L	(1) Relaxed position (2) During an isometric plantar flexion at 10 Nm Two consecutive measures with 1-minute rest for both positions	One examiner with a 4 hour training session on elastography under the supervision of a radiologist with 8 years experience in musculoskeletal US	NR	Entire 5 sec cine loop was analyzed instead of single static images and the mean calculated (MATLAB®; MathWorks, Natick, MA, USA	Different ROIs were drawn on the images, including reference material, Achilles tendon and Kager fat pad.
	Payne et al., 2017	Prone with feet hanging freely.	Midpoint of the tendon was calculated as half of the free Achilles tendon length, located and marked on participants’ skin following calcaneus palpation - insertion to soleus junction.	(1) L (2) T	(1) Relaxed position (2) Both feet fixed at a 90° position Five consecutive measurements were taken on one day and a further five measures were taken, one per day, at the same time of day, every day for a consecutive 5-day period	A medicine doctor with >15 years experience in musculoskeletal US	Extended field-of-view ‘SieScape’ images of the ‘free’ Achilles tendon	The data from each participant were averaged to provide one value from each measurement session. The ROIs were placed manually using the machine’s software in the same order in each scan, with ten ROIs placed along the length of the tendon, starting proximally and working distally in the longitudinal plane. Four ROIs were used within transverse measures, placed at the same location and in the sam…	As raw strain data were used for analysis, the use of a reference standard was not required
	Schneebeli et al., 2019	Prone with the foot tightly secured within the dynamometer with the ankle in a neutral position (0° of plantarflexion)	Level of the medial malleolus	(1) L	(1) During isometric plantar flexion under increasing contraction intensities (0 kg, 0.5kg, 1kg, 2kg, 5kg and, 10kg) fixed at an angle of 0° dorsiflexion. Performed one 5 sec clip	One examiner with 8 years of US and elastography experience	Elastography software	Customized MATLAB® software	External reference material - frames of the entire clip were averaged to extract a single image. Strain ratios were calculated between the Achilles tendon's median range of colours and the external reference material's median range of colours.
	Schneebeli et al., 2021	Prone exposing both ATs, with the legs extended and the feet placed over the examination couch, in contact with a dynamometer.	Level of the medial malleolus	(1) L	(1) During contractions of different intensities (0 kg, 0.5 kg, 1 kg, 2 kg, 5 kg and 10 kg) in a plantarflexed position using an ankle ergometer One measurement on each tendon at every load	Radiologist with 7 years of experience with elastography and experience with all devices used	Musculoskeletal preset	Strain elastography offline using custom made softwear	Reference material
Shear wave elastography - velocity	Aubry et al., 2013	Prone with legs extended	5 cm from the end of the tendon	(1) L (2) T	Passively mobilized ankle positions: (1) maximal plantar flexion, (2) 45° plantar flexion, (3) 0° flexion, (4) 45° dorsiflexion or maximal dorsiflexion for patients who did not sustain 45° dorsiflexion	Three examiners with > 6 years experience in musculoskeletal US	Elastographic mode	SWE on US	Constant round size (3 mm in diameter) situated in the center of the tendon 5 cm from its end, in both planes
	De Wall et al., 2014	Prone on an examination table, with their foot extended and hanging off of the edge of the table using a plastic goniometer to measure the resting ankle angle	Whole tendon from insertion to 70mm proximal of the gastrocnemius muscle–tendon junction	(1) L	(1) Resting ankle angle (2) Plantarflexed (3) Dorsiflexed	One examiner but experience not reported	Musculoskeletal preset	Stored in DICOM images exported from the system	A region of interest was manually defined within the tendon for all images using a custom Matlab. Five 10mm by 10mm boxes
	Aubry et al., 2015	Prone with their legs extended	At 5 cm from the enthesis	(1) L (2) T	Passively mobilized ankle positions (1) Maximal plantarflexion (2) 0° flexion	One examiner with > 10 years of experience in musculoskeletal US	NR	Not reported	NR
	Dirrichs et al., 2016	Prone with the foot hanging freely beyond the examination couch in neutral subtalar position	Proximal, middle and distal part	(1) L	(1) Relaxed position	Two examiners with > 5 years of experience in US and SWE application	NR	SWE on US	ROI was 1 mm in the most rigid area of the tendon
	Fu et al., 2016	Prone with their feet hanging freely over the examination table in a relaxed position	5 cm from the tendon insertion of calcaneal tendon	(1) L (2) T	(1) Relaxed position	Two experienced independent examiners with > 5 years of experience in US	Virtual Touch IQ mode	SWE on US	Three ROIs (i.e., boxed with fixed dimensions of 1 × 0.5 cm) were placed in both planes of the Achilles tendon - an average was taken on 3 ROI
	Payne et al., 2017	Prone with both feet hanging clear of an examination table	Middle of the free AT from soleal junction to insertion	(1) L (2) T	(1) Relaxed foot position (2) Fixed in a 90° ankle joint position	Two examiners with >3 years experience in musculoskeletal US	Virtual Touch IQ mode	SWE on US	One image averaging 13 ROIs which were placed manually in the same order on longitudinal elastograms, at a standardised depth of 0.5 cm, along the tendon length, starting proximally and working distally. Four ROIs were used for transverse scans, placed in the same order at the same locations using standardised depths of 0.3 and 0.4 cm.
	Coombes et al., 2018	Prone with their leg extended and ankle resting over the edge of the plinth measured using a handheld goniometer	At mid-tendon and insertional regions of Achilles	(1) L	(1) Relxed foot position Two or three measurments repeated	One examiner	Shear wave elastography mode (penetration; persistence low; smoothing)	Processed offline using customized Matlab scripts	Manually traced on the adjacent B-mode image keeping within the peritendinous boundary-free tendon (ROI length 3 cm) and immediately proximal to the calcaneal attachment (ROI length 1 cm)
Shear wave elastography - modulus	Lima et al., 2017	Prone in a relaxed position	Over the AT, observing the proximal AT insertion at the right side of the rectangle map	(1) L	(1) Relaxed foot postion Two images for each foot	One ultrasound experienced examiner	Musculoskeletal or tendon presets, with scales ranging from 0-300 kPa and 0-800 kPa	Matlab R2013a routine (MathWorks, Natick, MA, USA), developed in-house, using the dicom image exported from the equipment.	Rectangle of 1 x 4 cm for tendon were selected for the elastographic color mapping
	Helfenstein-Didier et al., 2016	Prone with the right foot attached to the footplate	Over the distal insertion of the AT and over the myotendinous junction of the soleus muscle	(1) L	(1) Relaxed (i.e. plantar flexors in passive state, knee angle remained fully extended, measurements were performed every 5° from 50° of plantarflexion to 10°. Five measurements were performed over each position. Between each measurement the probe was removed and replaced over the same location.	One experienced examiner	MSK preset, specific home-made preset phase velocity mode	Averaging shear wave speed values over circular ROIs (circles with about 4 mm of diameter depending on the tendon size).	circular POI (Q-Box function) was used to measure mean shear wave speed
	Zhou et al., 2019	Prone with foot relaxed hung over the edge of bed, hip and knee joints fully extended,and ankle fixed at 90° using a customized and movable ankle foot orthosis	Most proximal outline of the calcaneus and 3cm above the calcaneal tuberosity	(1) L	(1) Relaxed foot position (2) At 90° ankle joint position Three images were captured at each measurement site of the tendon	Two examiners	Musculoskeletal mode, opacity was 85%	Q-Box™ to obtain the shear wave modulus from the system and stored for off-line analysis	Size of the ROI had to be set to 25x12mm and the Q-Box™ diameter was defined by the thickness of the tendon, which was the distance between the superior and inferior borders of the Achilles tendon
	Schneebeli et al., 2021	Prone exposing both ATs, with the legs extended and the feet placed over the examination couch, in contact with a dynamometer.	Level of the medial malleolus	(1) L	(1) Perform contractions of different intensities (0 kg, 0.5 kg, 1 kg, 2 kg, 5 kg and 10 kg) in plantarflexion position. One measurement on each tendon at every load	One musculoskeletal radiologist with 7 years of experience on elastography on all devices	Musculoskeletal preset	SWE on US	Manually drawn in post-processing full extent of the examined tendon
	Gatz et al., 2021	Prone with their feet hanging relaxed over the examination couch.	Midportion (2-6 cm)	(1) L	(1) Relaxed foot position 3 measurements for each location	One examiner with 5 years of experience in musculoskeletal ultrasound. Images analysed by another examiner	NR	SWE on US	2 ROIs were used: (1) circle of 3-mm diameter at maximum stifness and (2) individual area covering the whole tendon in the SWE measurement window.
cSWE	Suydam et al., 2015	Prone on a plinth with their ankle passively flexed at 10° dorsiflexion on a dynamometer to remove the slack	Free tendon distal to the soleus junction	(1) L	(1) Dorsiflexed position (2) During maximum voluntary isometric contraction into plantar flexion 5 readings with different frequencies and repeated 2 more times. Max iso-contraction repeated three times and average taken - an average of 3 trials across multiple time points rather than multiple measures	One experienced investigator	NA	Offline processing using Matlab, MathWorks, Natick, MA	NR
	Corrigan et al., 2019	Prone with the knee fully extended and foot secured in a dynamometer - forefoot positions included 20°, 10°, 0° and 10° of ankle plantarflexion 0° degrees and 10° of dorsiflexion.	Midportion of the tendon just distal to the myotendinous junction of the soleus - free tendon	(1) L	(1) 20° of plantarflexion (2) 10° of plantarflexion (3) 0° of plantarflexion (4) 10° of dorsiflexion	One experienced investigator	NA	Offline processing using Matlab, MathWorks, Natick, MA	Static shear modulus and viscosity were calculated on a pixel-wise basis and averaged across each pixel within the central 50% of the ROI
3D SWE	Götschi et al., 2021	Prone on an examination table with their foot hanging just over the edge, ensuring a relaxed ankle position	Distal portion of the tendon for a total length of approximately 10 cm.	(1) L	For 3D sweep (1) Relaxed foot position Measured 3 times	Two examiners	NA	Offline processing	Manually post-measurement - full-thickness portion of the tendon with a length of 2 cm averaging all pixel values of 6 frames.
			The central portion of the tendon		For 2D analysis (1) one-legged complete foot plantarflexion in a standing position, touching the wall for balance		NR	Offline processing
L-longitudinal, T- Transverse, NA - not applicable, NR - not reported
